# Supplementary material
Source: PubMed Central journal article supplement (PMC6091522)
Supplement: NIHMS980424-supplement-supplementary_material.pdf [file NIHMS980424-supplement-supplementary_material.pdf]

**Targeting the mitochondrial VDAC in hepatocellular carcinoma using a polyclonal antibody-conjugated to a nitrosyl ruthenium complex. The nitric oxide release effect**

SUPPLEMENTARY MATERIAL

Figure S1:

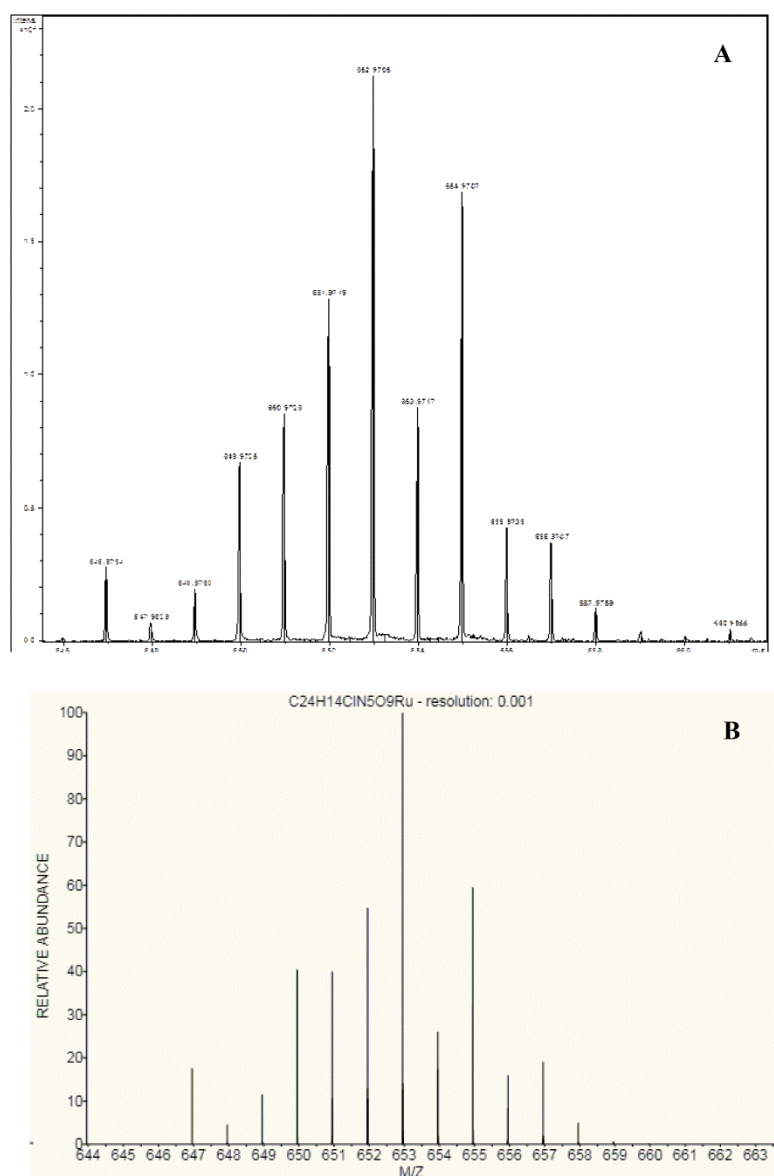

Figure S1: Maldi Toff mass spectrum of **Ru-DCBPY** complex. A) Experimental ( $m/z = 652.97$ ); B) Calculated ( $m/z = 652.95$ )

Figure S2

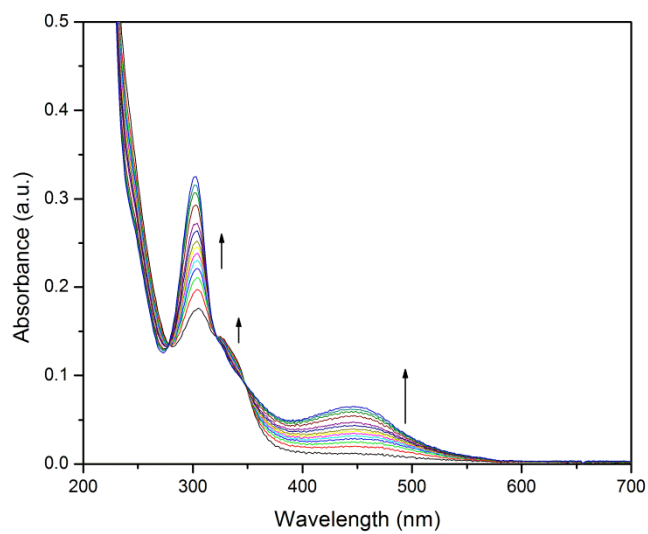

Figure S2: Spectral changes of the absorption spectrum accompanying OH<sup>-</sup> attack of **Ru-DCBPY** complex in aqueous solution, pH = 7.4.
